# Supplementary material for: p53 wild-type colorectal cancer cells that express a fetal gene signature are associated with metastasis and poor prognosis
Source: PubMed Central journal article supplement (PMC9126967; doi:10.1038/s41467-022-30382-9), 2022-05-23
Supplement: 41467_2022_30382_MOESM1_ESM.pdf [file 41467_2022_30382_MOESM1_ESM.pdf]

## Supplementary materials for

### **p53 wild type colorectal cancer cells that express a fetal gene signature are associated with metastasis and poor prognosis.**

Laura Solé, Teresa Lobo-Jarne, Daniel Alvarez-Villanueva, Josune Alonso-Marañón, Yolanda Guillén, Marta Guix, Irene Sangrador, Catalina Rozalén, Anna Vert, Antonio Barbachano, Joan Lop, Marta Salido, Beatriz Bellosillo, Raquel García-Romero, Marta Garrido, Jessica González, María Martínez-Iniesta, Erika Lopez-Arribillaga, Ramón Salazar, Clara Montagut, Ferrán Torres, Mar Iglesias, Toni Celià-Terrassa, Alberto Muñoz, Alberto Villanueva, Anna Bigas\* and Lluís Espinosa\*.

\* Correspondence should be addressed to A.B. or L.E. ([abigas@imim.es](mailto:abigas@imim.es); [lespinosa@imim.es](mailto:lespinosa@imim.es))

**This PDF file includes:  
Supplementary figures 1 to 6 and  
Supplementary tables 1 to 6**

## **Reagents, antibodies and software**

A table of the source of all reagents, antibodies, kits, cell lines, chemicals and software are included (Table S4).

## **Supplementary Figures, Tables and Data:**

Fig. S1. Low-dose CT treatment induces a quiescent-like state to CRC PDO in the absence of persistent DNA damage and senescence.

Fig. S2. PQL cells retain tumor initiating capacity.

Fig. S3. Low-dose CT induces a robust p53 signaling.

Fig. S4. Acquisition of a quiescent phenotype by CT treatment in patients.

Fig. S5. Acquisition of a restricted fetal ISC signature by CT and p53 dependency.

Fig. S6. Identification of a fetal ISC signature with prognostic value in cancer.

Table S1. Patient-derived organoids used in this study.

Table S2. Human gastrointestinal tumor samples used in this study.

Table S3. Cox proportional hazards analysis of the feISC signature..

Table S4. Materials table.

Table S5. List of oligonucleotides for RT-qPCR and ChIP-qPCR and sgRNA for CRISPR/Cas9 knockout used in this study.

Table S6. Tissue microarray (TMA) samples data.

Data 1. Differentially expressed genes between IC20 or IC30 and untreated PDOs.

Data 2. Expression correlation matrix from CT induced feISC genes in the Marisa dataset.



## Supplementary References

1. Kim D, Pertea G, Trapnell C, et al. TopHat2: Accurate alignment of transcriptomes in the presence of insertions, deletions and gene fusions. *Genome Biol* 2013.
2. Anders S, Pyl PT, Huber W. HTSeq-A Python framework to work with high-throughput sequencing data. *Bioinformatics* 2015.
3. Mulero M, Ferres-Marco D, Islam A, et al. Chromatin-bound I $\kappa$ B $\alpha$  regulates a subset of polycomb target genes in differentiation and cancer. *Cancer Cell* 2013;24.
4. Krueger B, Friedrich T, Förster F, et al. Different evolutionary modifications as a guide to rewire two-component systems. *Bioinform Biol Insights* 2012.
5. Langmead B, Salzberg SL. Fast gapped-read alignment with Bowtie 2. *Nat Methods* 2012.
6. Zhang Y, Liu T, Meyer CA, et al. Model-based analysis of ChIP-Seq (MACS). *Genome Biol* 2008.
7. Yu G, Wang LG, He QY. ChIP seeker: An R/Bioconductor package for ChIP peak annotation, comparison and visualization. *Bioinformatics* 2015;31:2382–2383.
8. Sato T, Stange DE, Ferrante M, et al. Long-term expansion of epithelial organoids from human colon, adenoma, adenocarcinoma, and Barrett's epithelium. *Gastroenterology* 2011.

## **Supplementary Figures and Legends**

Figure S1. Low-dose CT treatment induces a quiescent-like state to CRC PDO in the absence of persistent DNA damage and senescence

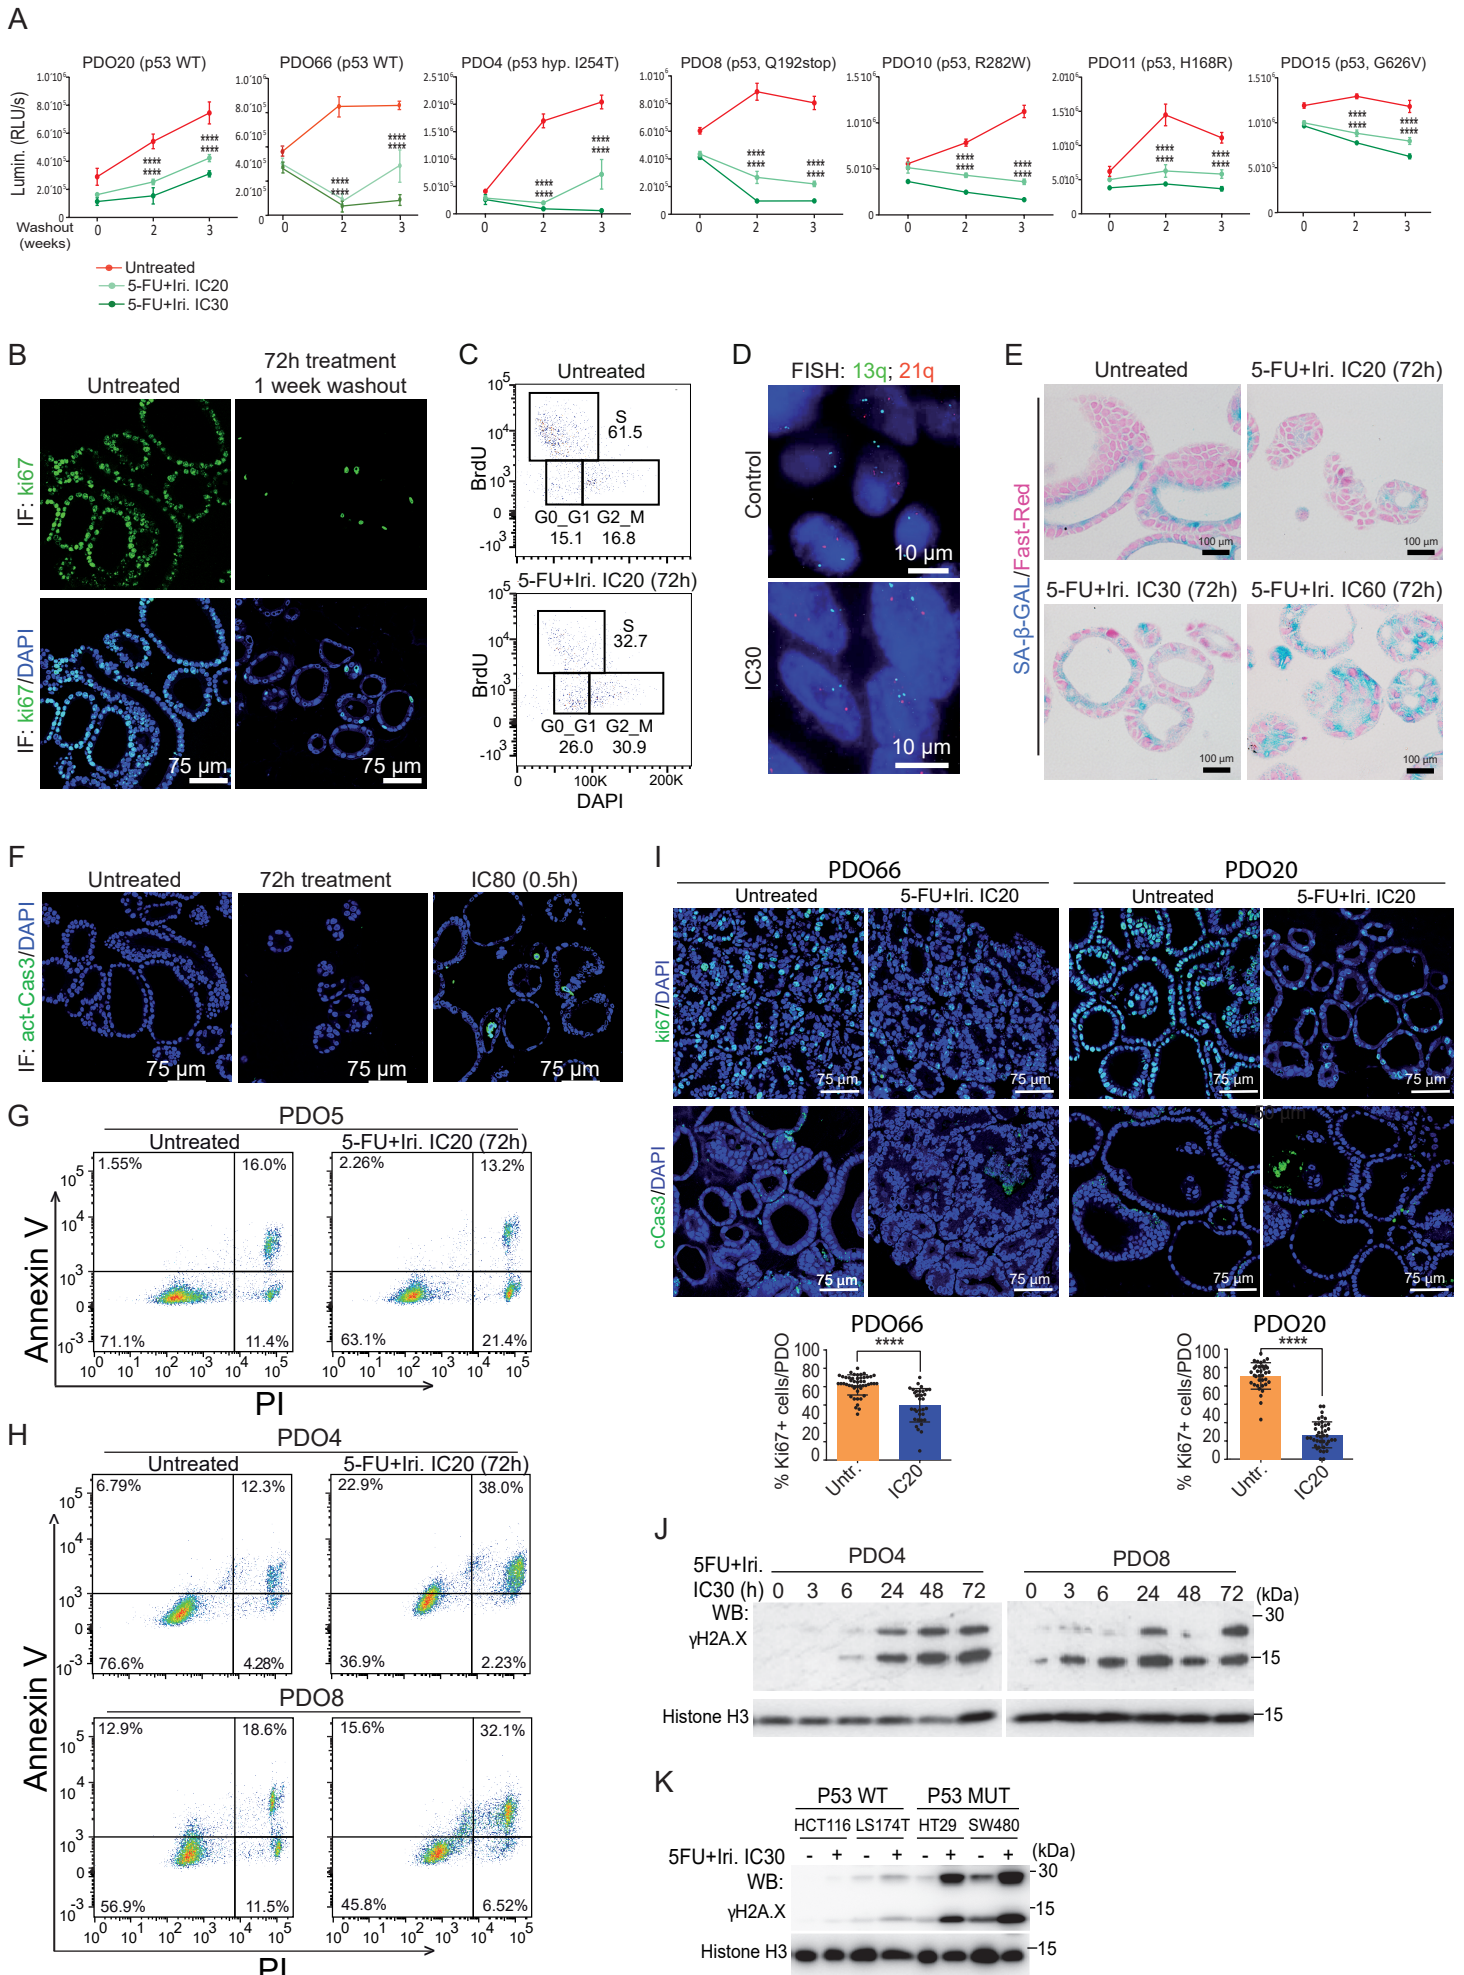

**Figure S1. Related to Figure 1. Low-dose CT treatment induces a quiescent-like state to CRC PDO in the absence of persistent DNA damage and senescence.**

**(A)** Quantification of cell viability of the different PDOs untreated or pretreated with 5-FU+Iri. for 72 hours and then maintained in fresh medium for 1-2 weeks after washout (n = 3 replicates, from 1 out of 3 biologically independent experiments). **(B)** Representative images of the proliferation marker ki67 staining by IF in PDO5 tumoroid treated with 5-FU+Iri. at IC<sub>20</sub> for 72 hours and after being maintained in fresh medium for 1 week (from 1 out of 3 biologically independent experiments). **(C)** Flow cytometry analysis showing BrdU incorporation of PDO5 after 72 hours of 5-FU+Iri. treatment, compared with the untreated cells. Boxes represent cells in G<sub>0</sub>/G<sub>1</sub>, S and G<sub>2</sub>/M cell cycle, respectively. **(D)** Representative images of FISH analysis from untreated and IC<sub>30</sub>-treated PDO5 using probes for 13q (green) and 21q (red) (from 1 out of 2 biologically independent experiments). **(E)** Analysis of SA-β-Gal activity in PDO5 cells treated with 5-FU+Iri. as indicated for 72 hours. Representative images were obtained with Olympus BX61 (from 1 out of 2 biologically independent experiments). **(F)** Representative IF images of cleaved-caspase 3 staining in PDO5 treated with 5-FU+Iri. at IC<sub>20</sub> at the indicated time points and with IC<sub>80</sub> as a positive control (from 1 out of 3 biologically independent experiments). **(G and H)** Cytometry analysis of Annexin V binding in PDO5 **(G)**, PDO4 and PDO8 **(H)** untreated or treated as indicated. **(I)** Representative IF images of ki67 and cleaved-caspase 3 staining in PDO66 and PDO20 treated with 5-FU+Iri. at IC<sub>20</sub> at the indicated time points (n = 35 spheres examined over 3 biologically independent experiments). **(J and K)** WB analysis of PDOs **(J)** and CRC cell lines **(K)** treated as indicated (from 1 out of 3 biologically independent experiments).

For all applicable figures, data are mean ± SD. Significance (p) was calculated in I with two-sided Student's t-test and in A with two-way ANOVA test. \*\*\*\*p < 0.0001. SA-β-Gal, SA-β-Galactosidase; 5-FU, 5-fluorouracil; Iri, irinotecan; CT, control; IC<sub>20</sub> and IC<sub>30</sub>, 5-FU+Iri. treatment that results in 20% and 30% cell death, respectively, compared with untreated. Source data are provided as a Source Data file.

Figure S2. PQL cells retain tumor initiating capacity

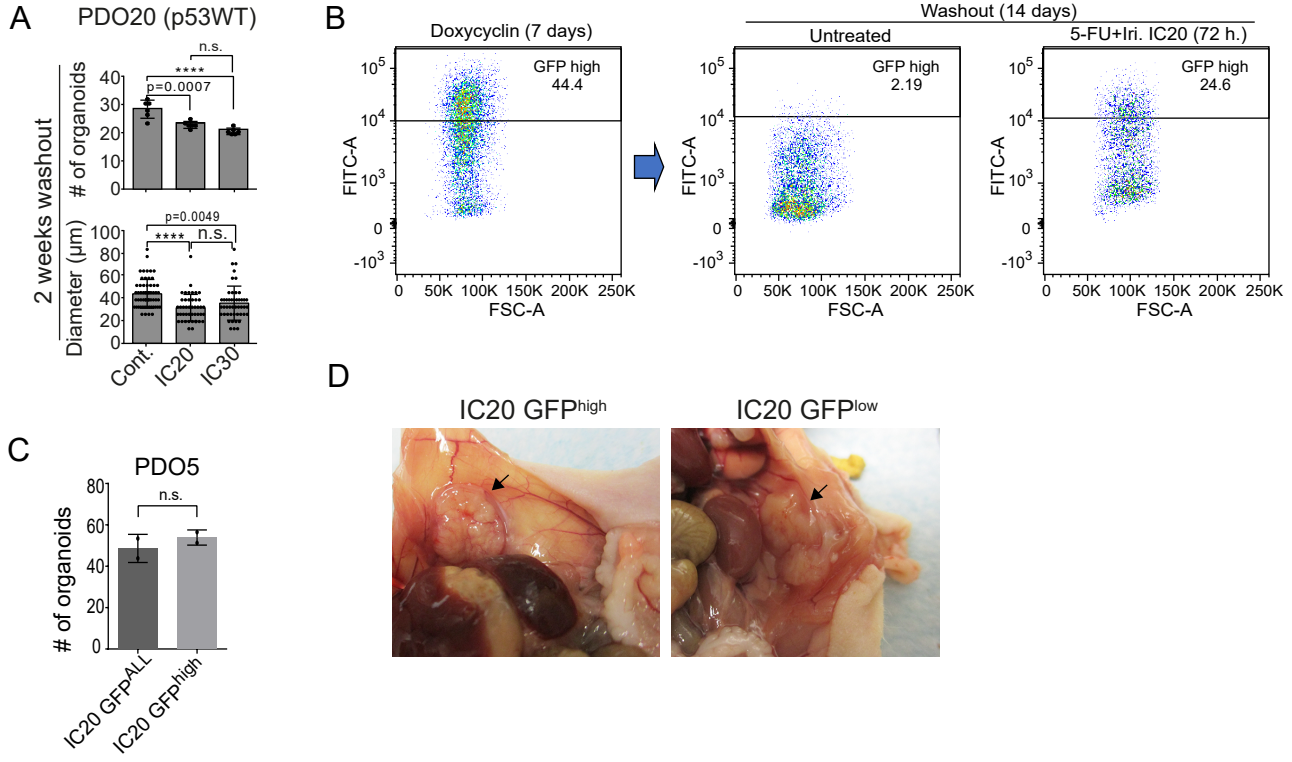

**Figure S2. Related to Figure 2. PQL cells retain tumor initiating capacity.**

**(A)** Number of PDOs (upper panel) and diameter (lower panel) of *TP53* WT PDO20 treated with 5-FU+Iri. as indicated, and left for 2 weeks with fresh medium. 300 cells/well were seeded (n = 6 wells examined for TICs and n = more than 45 spheres examined whenever possible for diameters, from 3 biologically independent experiments). **(B)** Analysis of GFP distribution by flow cytometry of PDO5-hG. Cells were treated for 6 days with doxycycline to induce GFP-H2B expression and then left untreated or treated with 5-FU+Iri. IC<sub>30</sub> for 72 hours and maintained in fresh medium for 2 additional weeks. Quiescent cells that retained high or low GFP levels were purified by cell sorting. **(C)** Number of PDOs generated from seeding 300 GFP<sup>high+low</sup> and GFP<sup>high</sup> sorted PDO5-hG cells after 2 weeks with fresh medium (n = 6 wells examined for TICs and n = more than 50 spheres examined whenever possible for diameters, from 3 biologically independent experiments). **(D)** Representative pictures of intraperitoneal implants (arrows) detected in nude mice orthotopically implanted with IC<sub>20</sub>-pretreated PDO5-hG GFP<sup>high</sup> or GFP<sup>low</sup> sorted cells.

For all applicable figure panels, data are mean ± SD. Significance (p) was calculated in A with one-way ANOVA test and in C with two-sided Student's t-test test. \*\*\*\*p < 0.0001; n.s., no significant. 5-FU, 5-fluorouracil; Iri, irinotecan; IC<sub>20</sub>, 5-FU+Iri. treatment that results in 20% cell death, compared with untreated cell growth. Source data are provided as a Source Data file.

Figure S3. Low-dose CT induces a robust p53 signaling

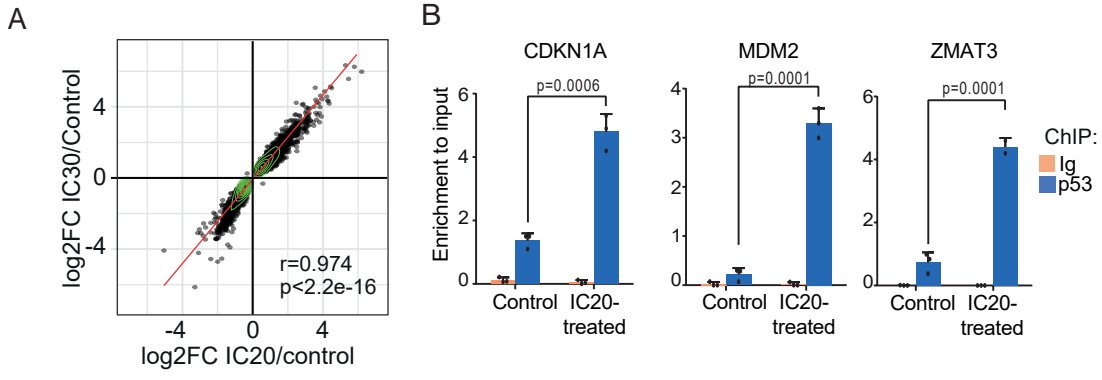

**Figure S3. Related to Figure 3. Low-dose CT induces a robust p53 signaling.**

**(A)** Linear association of the genes differentially expressed in treated PDO5 compared with the control. Dots represent the log<sub>2</sub> fold change values of genes for IC20 compared with control (x-axis) and IC30 compared with control (y-axis). The Pearson correlation and p value are shown. **(B)** ChIP-qPCR analysis of p53 binding in untreated and IC20-treated PDO5 in a subset of putative p53 target genes expressed as relative enrichment normalized to the input (a validation of the ChIP-seq).

For all applicable figure panels, data are mean  $\pm$  SD. Significance (p) was calculated with two-sided Student's t-test. CT, IC20 and IC30, 5-FU+Iri. treatment that results in 20% and 30% cell death, respectively, compared with untreated cell growth. Source data are provided as a Source Data file.



Figure S4. Acquisition of quiescent phenotype by CT treatment in patients.

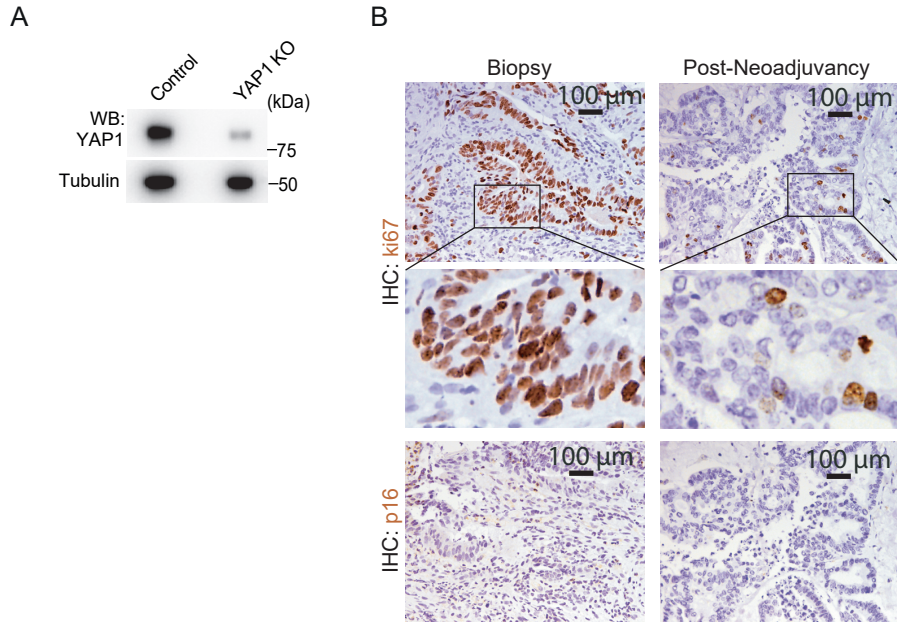

**Figure S4. Related to Figure 4. Acquisition of quiescent phenotype by CT treatment in patient samples.**

**(A)** WB analysis of PDO5 control and *YAP1* KO (from 1 out of 3 biologically independent experiments). **(B)** IHC analysis of ki67 and p16 in representative type 2 colorectal tumor samples (Supplementary Table S2 #17) from the same patient at diagnosis (biopsy) and after neoadjuvant therapy at the time of surgery (post-neoadjuvancy) (from 1 out of 6 biologically independent samples).

Figure S5. Restricted 28up + 8 down feISC signature and p53 dependency

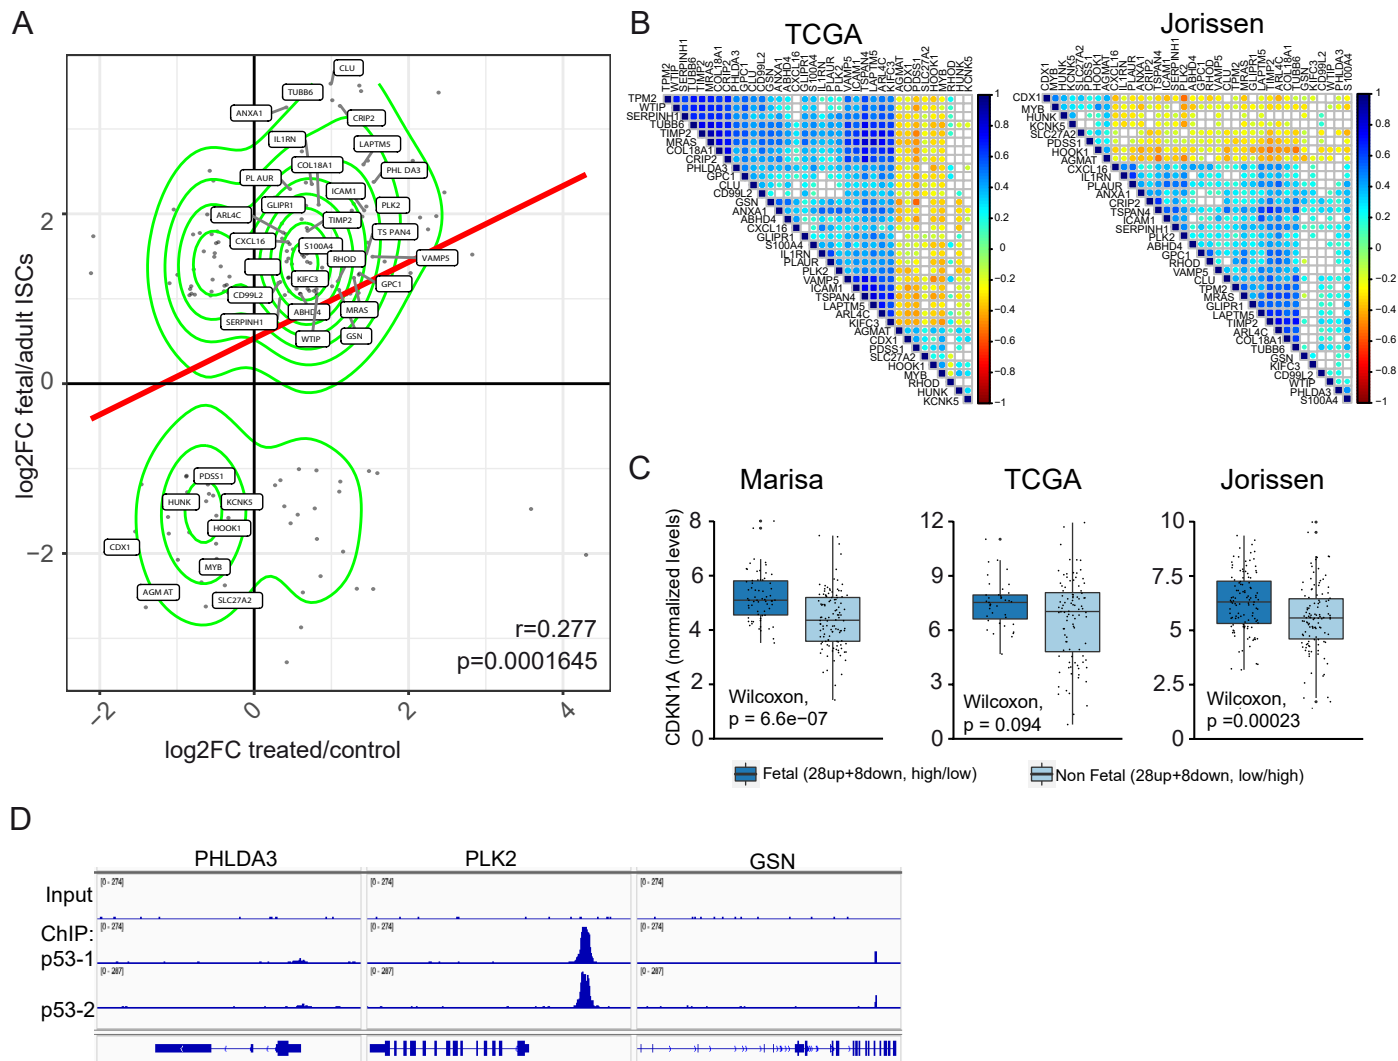

**Figure S5. Related to Figure 5. Acquisition of a restricted feISC signature by CT and p53 dependency.**

**(A)** Scatter plot and linear regression line of the genes differentially expressed between CT treated and control PDOs and fetal compared with adult ISC. Dots represent the log<sub>2</sub> fold change values of genes for treated versus control (x-axis) and fetal versus adult ISC (y-axis). The Pearson correlation and p-value are shown. Genes included in the 28up+8down-feISC signature are indicated. **(B)** Expression correlation matrix from the 28up+8down-feISC gene signature in TCGA (n=329) and Jorissen (n=226) databases. Size of circles and color intensity are proportional to Pearson correlation coefficient for each gene pair. **(C)** Box plots of *CDKN1A* levels in tumors classified as 28up+8down-feISC (fetal type or non-fetal type) from the Marisa (fetal n=66, non-fetal n=114), Jorissen (fetal n=114, non-fetal n=112), and TCGA (fetal n=39, non-fetal n=96), datasets. Boxes represent the central 50% of the data (from the lower 25th percentile to the upper 75th percentile), lines inside boxes represent the median (50th percentile), and whiskers are extended to the most extreme data point. Statistical p value from Wilcoxon two-sided test is shown. **(D)** Representation of p53 distribution in the indicated genomic regions of 28up feISC genes obtained from CHIP-sequencing analysis in IC<sub>20</sub>-treated PDO5 (n=2).

Figure S6. Identification of a fetal ISC signature with prognostic value in *TP53* WT CRC

A

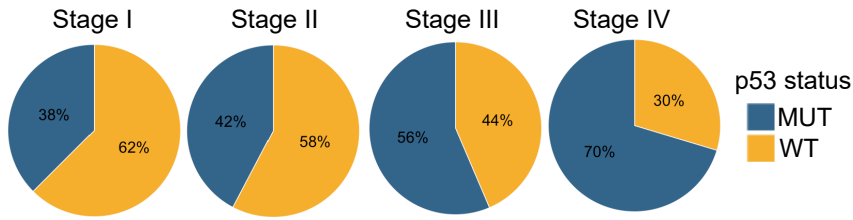

B

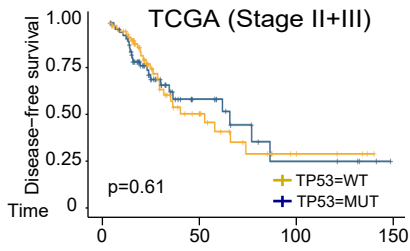

C

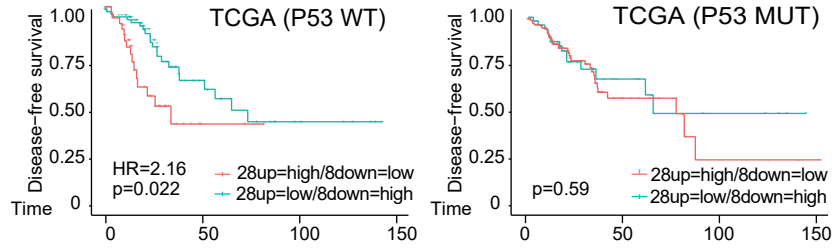

D

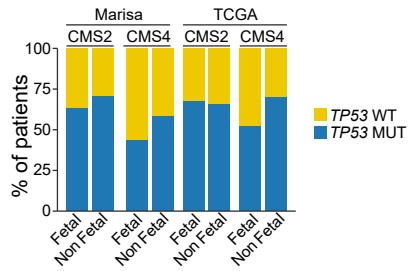

**Figure S6. Related to Figure 6. Identification of a fetal ISC signature with prognostic value in cancer.**

**(A)** Distribution of tumors from the TCGA colorectal cancer dataset carrying WT and mutated *TP53* inside the different tumor stages. **(B)** Kaplan-Meier representation of disease-free survival probability over time of patients classified according to their *TP53* status (*TP53* WT  $n=144$  and *TP53* MUT  $n=177$ ) in the TCGA dataset. **(C)** Kaplan-Meier representation of disease-free survival probability over time of patients, from the TCGA dataset, classified according to their cluster analysis of the 28up+8down-feISC signature (data not shown) for patient groups from *TP53* WT ( $n=144$ ) and *TP53* mutant ( $n=177$ ). **(D)** Percent of tumors with *TP53* WT or *TP53* mutant alleles in the CMS2 and CMS4 subgroups from Marisa and TCGA datasets, previously classified according to the 28up+8down-feISC signature. Fetal: 28up=high/8down=low; non-Fetal: 28up=low/8down=high.

For statistical analysis of the Kaplan-Meier estimates we used Cox proportional hazards models analysis and logrank two-sided p value (See Supplementary Table S3). HR, hazard ratio.

**Supplementary Table S1. Patient-derived organoids and CRC cells lines used in this study.** The mutations and the corresponding chemotherapy concentrations that reduce a 20 and 30% of the cell growth (IC<sub>20</sub> and IC<sub>30</sub>, respectively) are indicated for each PDO and cell line.

| Cell line      | Mutations                                                                                                                                                                               | IC <sub>20</sub> (µg/mL) | IC <sub>30</sub> (µg/mL) | Source                                         |
|----------------|-----------------------------------------------------------------------------------------------------------------------------------------------------------------------------------------|--------------------------|--------------------------|------------------------------------------------|
| PDO4           | TP53 I254T (100%)<br>EGFR S464L (97.21%)                                                                                                                                                | 5-FU 1.25<br>Iri. 0.50   | 5-FU 2.00<br>Iri. 0.80   | Primary tumor                                  |
| PDO5           | KRAS G12D (66.43%)                                                                                                                                                                      | 5-FU 0.14<br>Iri. 0.06   | 5-FU 0.25<br>Iri. 0.10   | Primary tumor                                  |
| PDO5 (p53 KO)  | KRAS G12D (66.43%)                                                                                                                                                                      | 5-FU 0.25<br>Iri. 0.10   | n.d.                     | Derived from PDO5                              |
| PDO5 (YAP1 KO) | KRAS G12D (66.43%)                                                                                                                                                                      | n.d.                     | 5-FU 0.14<br>Iri. 0.06   | Derived from PDO5                              |
| PDO8           | TP53 Q192stop (98.46%)<br>KRAS G13C (67.27%)                                                                                                                                            | 5-FU 0.78<br>Iri. 0.31   | 5-FU 1.56<br>Iri. 0.63   | Primary tumor                                  |
| PDO10          | TP53 R282W (99.82)<br>FGFR2 C809W (62.72%)<br>KRAS A146V (80.25%)                                                                                                                       | 5-FU 6.25<br>Iri. 2.50   | 5-FU 12.50<br>Iri. 5.00  | Primary tumor                                  |
| PDO11          | TP53 H168R (46.54%)<br>FGFR2 N194stop (45.87%)<br>KRAS G12D (49.58%)<br>ERBB2 A87T (4.76%)<br>PIK3CA S874N (41.93%)<br>PDGFRA R293H (5.97%)<br>EGFR K960R (46.3%)<br>BRAF E71D (42.08%) | 5-FU 0.78<br>Iri. 0.31   | 5-FU 1.56<br>Iri. 0.63   | Liver metastasis. CT and Cetuximab resistant   |
| PDO15          | TP53 G262V (98.82%)                                                                                                                                                                     | 5-FU 1.56<br>Iri. 0.63   | 5-FU 3.13<br>Iri. 1.25   | Ovarian metastasis. CT and Cetuximab resistant |
| PDO66          | NRAS (G12S) (99.05%)<br>APC (S1110stop) (99.80)                                                                                                                                         | 5-FU 0.63<br>Iri. 0.30   | 5-FU 2.50<br>Iri. 1.00   | Primary tumor                                  |
| PDO20          | APC Q1123X (60.38%)<br>KRAS G12V (26.42%)<br>PI3KCA H1047L (49.94%)                                                                                                                     | 5-FU 0.25<br>Iri. 0.10   | 5-FU 0.50<br>Iri. 0.20   | Primary tumor                                  |
| HCT116         | TP53 WT                                                                                                                                                                                 | n.d.                     | 5-FU 0.2<br>Iri. 0.08    | Cell line                                      |
| Ls174T         | TP53 WT                                                                                                                                                                                 | n.d.                     | 5-FU 0.3<br>Iri. 0.13    | Cell line                                      |
| LoVo           | TP53 WT                                                                                                                                                                                 | n.d.                     | 5-FU 0.06<br>Iri. 0.02   | Cell line                                      |
| DLD1           | TP53 S241F; -                                                                                                                                                                           | n.d.                     | 5-FU 0.12<br>Iri. 0.05   | Cell line                                      |
| SW480          | TP53 R273H, P309S                                                                                                                                                                       | n.d.                     | 5-FU 3.33<br>Iri. 1.33   | Cell line                                      |
| HT29-M6        | TP53 R273H                                                                                                                                                                              | n.d.                     | 5-FU 3.33<br>Iri. 1.33   | Cell line                                      |

**Supplementary Table S2. Human gastrointestinal tumor samples used in this study.** Paired samples at diagnosis (biopsy) and after neoadjuvant therapy at the time of surgery (postQ). The corresponding clinical data, ki67 subtype classification (1. No changes in ki67 levels; 2. Decrease in ki67 levels; 3. Decrease in ki67 levels displaying giant nuclei) and presence of nuclear YAP1 is indicated.

| Patient n° | Tumor Localization | Clinical TNM | Treatment                       | ki67% postQ | ki67% biopsy | ki67 subtype | nuclear YAP1% postQ | nuclear YAP1% biopsy | OS (mo) | DFS (mo) |
|------------|--------------------|--------------|---------------------------------|-------------|--------------|--------------|---------------------|----------------------|---------|----------|
| 1          | Gastric            | T4N1M1       | Chemotherapy                    | 20          | 40           | 2            | 30                  | 0                    | 7,13    | 5,40     |
| 2          | Colorectal         | T3N1M1       | Chemotherapy + Targeted therapy | 1           | 55           | 3            | N/A                 | N/A                  | 115,23  | 115,23   |
| 3          | Gastric            | T3N1         | Chemotherapy                    | 10          | 70           | 2            | 90                  | 5                    | 60,90   | 60,90    |
| 4          | Colorectal         | T3N1M1       | Radiotherapy                    | 5           | 70           | 2            | N/A                 | N/A                  | 17,33   | 9,50     |
| 5          | Gastric            | T3N1M0       | Chemotherapy                    | 5           | 60           | 2            | 80                  | 5                    | 26,73   | 12,23    |
| 6          | Colorectal         | T3N0         | Chemotherapy                    | 30          | 70           | 2            | 50                  | 2                    | 53,10   | 53,10    |
| 7          | Gastric            | T3N1M1       | Chemotherapy                    | 70          | 90           | 2            | 90                  | 80                   | 41,10   | 23,07    |
| 8          | Gastric            | T3N1M1       | Chemotherapy + Targeted therapy | 10          | 5            | 1            | 70                  | 0                    | 89,83   | 40,23    |
| 9          | Colorectal         | T3N1         | Chemotherapy                    | 15          | 75           | 2            | N/A                 | N/A                  | 94,23   | 94,23    |
| 10         | Gastric            | T3N0M0       | Chemotherapy                    | 85          | 95           | 1            | 5                   | 10                   | 91,10   | 91,10    |
| 11         | Gastric            | T2-3N1M0     | Chemotherapy                    | 90          | 90           | 1            | N/A                 | N/A                  | 93,37   | 93,37    |
| 12         | Gastric            | T3N1M0       | Chemotherapy                    | 80          | 90           | 1            | N/A                 | N/A                  | 97,70   | 97,70    |
| 13         | Gastric            | T3N0M0       | Chemotherapy                    | 20          | 70           | 2            | 0                   | 0                    | 25,23   | 9,67     |
| 14         | Colorectal         | T4N1         | Chemotherapy                    | 80          | 60           | 1            | 95                  | 20                   | 38,17   | 12,43    |
| 15         | Gastric            | T3N1M1       | Chemotherapy + Targeted therapy | 70          | 85           | 1            | 50                  | 15                   | 93,37   | 93,37    |
| 16         | Colorectal         | T3N1         | Chemotherapy + Targeted therapy | 10          | 80           | 2            | 90                  | 0                    | 42,67   | 21,67    |
| 17         | Colorectal         | T4N1M0       | Chemotherapy                    | 20          | 95           | 2            | 60                  | 20                   | 39,90   | 39,90    |
| 18         | Colorectal         | T3N0M0       | Chemotherapy                    | 40          | 90           | 2            | N/A                 | N/A                  | 81,53   | 81,53    |
| 19         | Colorectal         | T2N1M0       | Chemotherapy                    | 5           | 25           | 3            | 90                  | 3                    | 83,13   | 83,13    |
| 20         | Colorectal         | T4N1M0       | Chemotherapy                    | 20          | 60           | 2            | 70                  | 60                   | 94,03   | 94,03    |
| 21         | Colorectal         | T3N1M0       | Chemotherapy                    | 25          | 80           | 2            | N/A                 | 30                   | 91,90   | 91,90    |
| 22         | Colorectal         | T3N1M0       | Chemotherapy                    | 1           | 95           | 2            | N/A                 | N/A                  | 88,30   | 88,30    |
| 23         | Colorectal         | T3N2bM0      | Chemotherapy                    | 1           | 90           | 2            | 30                  | 30                   | 76,53   | 76,53    |
| 24         | Gastric            | T3N1M0       | Chemotherapy                    | 20          | 20           | 1            | 90                  | 0                    | 29,87   | 12,77    |
| 25         | Colorectal         | T3N1M0       | Chemotherapy                    | N/A         | N/A          | N/A          | N/A                 | N/A                  | 79,77   | N/A      |
| 26         | Colorectal         | T3N0M0       | Chemotherapy                    | N/A         | N/A          | N/A          | N/A                 | N/A                  | 53,63   | N/A      |
| 27         | Colorectal         | T3N0M0       | Chemotherapy                    | 1           | 55           | 2            | 5                   | 10                   | 8,53    | 8,53     |
| 28         | Colorectal         | T3N1M0       | Chemotherapy + Targeted therapy | 40          | 65           | 2            | 30                  | 1                    | 121,23  | 27,47    |
| 29         | Colorectal         | T3N1M0       | Chemotherapy                    | N/A         | N/A          | N/A          | N/A                 | N/A                  | 33,90   | 20,83    |
| 30         | Colorectal         | T3N0         | Chemotherapy                    | 20          | 10           | 1            | 70                  | 3                    | 60,30   | 60,30    |



|    |            |                                               |                                       |     |     |     |     |     |       |       |
|----|------------|-----------------------------------------------|---------------------------------------|-----|-----|-----|-----|-----|-------|-------|
| 31 | Gastric    | T3N0                                          | Chemotherapy                          | 20  | 30  | 1   | 100 | 0   | 12,17 | 9,10  |
| 32 | Gastric    | T3N1                                          | Chemotherapy                          | 30  | 40  | 1   | N/A | N/A | 16,53 | 8,40  |
| 33 | Gastric    | T3N0M0                                        | Chemotherapy                          | 30  | 70  | 2   | 80  | 5   | 77,93 | 77,93 |
| 34 | Colorectal | T3N1M1                                        | Chemotherapy<br>+ Targeted<br>therapy | 5   | 80  | 2   | 90  | 0   | N/A   | N/A   |
| 35 | Colorectal | T3N1M0                                        | Radiotherapy                          | 1   | 60  | 2   | 100 | 15  | 69,50 | 69,50 |
| 36 | Gastric    | T3N1M0                                        | Chemotherapy                          | 25  | N/A | N/A | N/A | N/A | 39,37 | 39,37 |
| 37 | Gastric    | T3N1M0                                        | Chemotherapy                          | 20  | 55  | 2   | 2   | 2   | 65,10 | 65,10 |
| 38 | Gastric    | T3N1M0                                        | Chemotherapy                          | 10  | 20  | 1   | 60  | 20  | 39,23 | 22,73 |
| 39 | Pancreas   | T4N0M0                                        | Chemotherapy                          | 0   | N/A | N/A | N/A | N/A | 45,63 | 15,63 |
| 40 | Colorectal | T3N1M1                                        | Chemotherapy                          | 25  | 30  | 1   | 90  | 10  | 18,23 | 6,00  |
| 41 | Colorectal | T3N0M0                                        | Radiotherapy                          | 25  | 40  | 1   | 30  | 0   | 41,77 | 41,77 |
| 42 | Colorectal | T3N0M1                                        | Chemotherapy<br>+ Targeted<br>therapy | 40  | 90  | 2   | 90  | 0   | 22,50 | 10,13 |
| 43 | Colorectal | T4N1M0                                        | Chemotherapy                          | 0   | 65  | 2   | 0   | 5   | 45,60 | 11,90 |
| 44 | Colorectal | T3N1                                          | Chemotherapy                          | 5   | 15  | 1   | 0   | 5   | 8,70  | 8,70  |
| 45 | Colorectal | T3N0M0                                        | Chemotherapy                          | 1   | 70  | 2   | N/A | N/A | 62,73 | 25,00 |
| 46 | Colorectal | T3N1M1                                        | Chemotherapy<br>+ Targeted<br>therapy | 5   | 50  | 2   | 80  | 0   | 33,47 | 18,43 |
| 47 | Colorectal | T3N2M0                                        | Chemotherapy                          | 60  | 95  | 2   | 0   | 2   | 59,63 | 26,40 |
| 48 | Colorectal | T3N1M0                                        | Chemotherapy                          | 20  | 60  | 2   | 30  | 0   | 56,20 | 56,20 |
| 49 | Gastric    | T4N0M0                                        | Chemotherapy                          | 50  | 60  | 1   | 50  | 50  | 42,70 | 42,70 |
| 50 | Colorectal | T3N0M0                                        | Chemotherapy                          | 10  | 70  | 2   | 5   | 0   | 47,60 | 47,60 |
| 51 | Gastric    | T2N1M0                                        | Chemotherapy                          | 15  | 75  | 2   | 2   | 0   | 38,73 | 16,70 |
| 52 | Colorectal | T3N0M0                                        | Chemotherapy                          | 5   | 25  | 2   | 30  | 0   | 63,37 | 63,37 |
| 53 | Colorectal | T3N1M0                                        | Chemotherapy                          | 20  | 95  | 2   | 30  | 0   | 9,00  | 9,00  |
| 54 | Gastric    | T3N3M0                                        | Chemotherapy                          | 15  | 60  | 2   | 30  | 0   | 11,93 | 11,03 |
| 55 | Colorectal | T4N1M0                                        | Radiotherapy                          | 20  | 30  | 1   | 15  | 0   | 34,73 | 34,73 |
| 56 | Colorectal | T2N1M0                                        | Chemotherapy                          | N/A | N/A | N/A | N/A | N/A | 53,27 | N/A   |
| 57 | Colorectal | T3N1M0                                        | Chemotherapy                          | 45  | 85  | 2   | 50  | 5   | 54,47 | 54,47 |
| 58 | Colorectal | T3N0M0                                        | Chemotherapy                          | 70  | 90  | 2   | 90  | 20  | 50,67 | 50,67 |
| 59 | Colorectal | T3N0M0                                        | Chemotherapy                          | 45  | 80  | 2   | 70  | 25  | 12,23 | 5,00  |
| 60 | Colorectal | T4N2M0                                        | Chemotherapy                          | 75  | 95  | 2   | 40  | 0   | 22,47 | 4,27  |
| 61 | Colorectal | T3Nx<br>(sigma)+<br>T2N0<br>(rectum)<br>M1    | Radiotherapy                          | 65  | 65  | 1   | N/A | N/A | 36,47 | 3,27  |
| 62 | Colorectal | T3N0<br>(rectum)<br>+ T4Nx<br>(bladder)<br>M1 | Radiotherapy                          | 80  | 95  | 1   | 80  | 5   | 5,37  | 3,53  |

**Table S3 Cox proportional hazards analysis of the feISC signature.** Association of the signature with recurrence-disease free survival. Related to Figure 5 and Figure S5.

| <b>GSE39582</b><br>(Marisa et al) | <b>28up=high</b><br><b>8down=low</b> | <b>p value</b><br><b>(logrank</b><br><b>test)</b> | <b>HR</b><br><b>recurrence</b> | <b>lower.95</b><br><b>(HR)</b> | <b>upper.95</b><br><b>(HR)</b> |
|-----------------------------------|--------------------------------------|---------------------------------------------------|--------------------------------|--------------------------------|--------------------------------|
| All stages, <i>n</i> =566         | <i>n</i> = 66                        | 8.00E-04                                          | 2.33                           | 1.40                           | 3.9                            |
| Stage II, <i>n</i> =149           | <i>n</i> = 23                        | 4.10E-02                                          | 2.27                           | 1.01                           | 5.1                            |
| Stage II-III, <i>n</i> =468       | <i>n</i> = 100                       | 3.30E-03                                          | 1.71                           | 1.19                           | 2.5                            |
| Stage IV, <i>n</i> =60            | <i>n</i> = 25                        | 2.37E-01                                          | 1.48                           | 0.77                           | 2.8                            |
| p53WT, <i>n</i> =85               | <i>n</i> = 27                        | 4.67E-02                                          | 2.16                           | 1.01                           | 4.6                            |
| p53MUT, <i>n</i> =20              | <i>n</i> = 6                         | 9.60E-01                                          | 1.04                           | 0.27                           | 4.0                            |
| CMS4, <i>n</i> =91                | <i>n</i> = 23                        | 7.60E-02                                          | 1.79                           | 0.92                           | 3.46                           |

| <b>TCGA-COAD+READ</b><br>(TCGA Portal) | <b>28up=high</b><br><b>8down=low</b> | <b>p value</b><br><b>(logrank</b><br><b>test)</b> | <b>HR</b><br><b>recurrence</b> | <b>lower.95</b><br><b>(HR)</b> | <b>upper.95</b><br><b>(HR)</b> |
|----------------------------------------|--------------------------------------|---------------------------------------------------|--------------------------------|--------------------------------|--------------------------------|
| All stages, <i>n</i> =329              | <i>n</i> = 39                        | 2.40E-02                                          | 2.20                           | 1.09                           | 4.43                           |
| P53WT, <i>n</i> =144                   | <i>n</i> = 47                        | 2.10E-02                                          | 2.16                           | 1.1                            | 4.20                           |
| P53MUT, <i>n</i> =177                  | <i>n</i> = 128                       | 5.90E-02                                          | 1.18                           | 0.63                           | 2.21                           |

| <b>GSE14333</b><br>(Jorissen et al) | <b>28up=high</b><br><b>8down=low</b> | <b>p value</b><br><b>(logrank</b><br><b>test)</b> | <b>HR</b><br><b>recurrence</b> | <b>lower.95</b><br><b>(HR)</b> | <b>upper.95</b><br><b>(HR)</b> |
|-------------------------------------|--------------------------------------|---------------------------------------------------|--------------------------------|--------------------------------|--------------------------------|
| All stages, <i>n</i> =226           | <i>n</i> = 114                       | 1.00E-04                                          | 3.28                           | 1.74                           | 6.18                           |

**Table S4. Materials table**

| REAGENT                                                           | or | SOURCE                   | IDENTIFIER                                           |
|-------------------------------------------------------------------|----|--------------------------|------------------------------------------------------|
| <b>Antibodies</b>                                                 |    |                          |                                                      |
| Mouse monoclonal anti- $\gamma$ H2AX (pS139) (clone N1-431 (RUO)) |    | BD Biosciences           | Cat#564719; RRID:AB_2738913 – (dilution 1/1000)      |
| Mouse monoclonal anti-Ki67 (clone MM1)                            |    | Leica Biosystems         | Cat#NCL-Ki67-MM1; RRID:AB_442101 – (dilution 1/1000) |
| Rabbit polyclonal anti-Cleaved Caspase-3 (Asp175)                 |    | Cell Signaling           | Cat#9661; RRID:AB_2341188 – (dilution 1/1000)        |
| Mouse monoclonal anti-p53 (clone DO-1)                            |    | Abcam                    | Cat#ab1101; RRID:AB_297667 – (dilution 1/1000)       |
| Rabbit monoclonal anti-p21 (clone EPR362)                         |    | Abcam                    | Cat#ab109520; RRID:AB_10860537 – (dilution 1/1000)   |
| Rabbit monoclonal anti-CKN2A/p16INK4a (clone EPR1473)             |    | Abcam                    | Cat#ab108349; RRID:AB_10858268 – (dilution 1/1000)   |
| Goat polyclonal anti-EphB2                                        |    | RD Systems               | Cat#AF467; RRID:AB_355375 – (dilution 1/1000)        |
| Rabbit polyclonal anti-CD99L2                                     |    | Abcam                    | Cat#ab224164 – (dilution 1/1000)                     |
| Mouse monoclonal anti-TIMP2 (clone 3A4)                           |    | Abcam                    | Cat#ab1828; RRID:AB_2256129 – (dilution 1/1000)      |
| Rabbit polyclonal anti-MRas                                       |    | Abcam                    | Cat#ab26303; RRID:AB_470849 – (dilution 1/1000)      |
| Rabbit polyclonal anti-TUBB6                                      |    | Abcam                    | Cat#PA5-P8948 – (dilution 1/2000)                    |
| Rabbit monoclonal anti-ICAM1 (clone EPR4776)                      |    | Abcam                    | Cat#ab109361; RRID:AB_10958467 – (dilution 1/1000)   |
| Rabbit monoclonal anti-Hsp47 (clone EPR4217)                      |    | Abcam                    | Cat#ab109117; RRID:AB_10888995 – (dilution 1/1000)   |
| Rabbit monoclonal anti-YAP1 (clone EP1674Y)                       |    | Abcam                    | Cat#ab52771; RRID:AB_2219141 – (dilution 1/1000)     |
| Rabbit polyclonal anti-TSPAN4                                     |    | Thermo Fisher Scientific | Cat#PA5-69344; RRID:AB_2688603 – (dilution 1/1000)   |
| Mouse monoclonal anti-S100A4 (clone CL0240)                       |    | Atlas Antibodies         | Cat#AMAB90599; RRID:AB_2665603 – (dilution 1/1000)   |

|                                                                          |                                                        |                                                                                    |
|--------------------------------------------------------------------------|--------------------------------------------------------|------------------------------------------------------------------------------------|
| Rabbit polyclonal anti-Histone H3 antibody-Nuclear Marker and ChIP Grade | Abcam                                                  | Cat#ab1791; RRID:AB_302613 – (dilution 1/10000)                                    |
| Mouse monoclonal anti-alpha-Tubulin (clone B-5-1-2)                      | Sigma-Aldrich                                          | Cat#T6074; RRID:AB_477582 – (dilution 1/10000)                                     |
| Goat Anti-Rabbit Immunoglobulins/HRP antibody (2ary)                     | Agilent                                                | Cat#P0448; RRID:AB_2617138 – (dilution 1/2000)                                     |
| Rabbit Anti-Mouse Immunoglobulins/HRP antibody (2ary)                    | Agilent                                                | Cat#P0260; RRID:AB_2636929 – (dilution 1/2000)                                     |
| Polyclonal Rabbit Anti-Goat Immunoglobulins/HRP antibody (2ary)          | Agilent                                                | Cat#P0449; RRID:AB_2617143 – (dilution 1/2000)                                     |
| <b>Biological Samples</b>                                                |                                                        |                                                                                    |
| Patient-derived organoids (PDO): PDO4, PDO5, PDO8, PDO10, PDO11, PDO15   | Hospital del Mar (Barcelona)                           | MARBiobanc ( <a href="https://marbiobanc.imim.es">https://marbiobanc.imim.es</a> ) |
| Patient-derived organoids (PDO): PDO66                                   | From Alberto Muñoz Lab (Fernández-Barral et al., 2020) | RetBioH ( <a href="http://www.redbiobancos.es">www.redbiobancos.es</a> )           |
| Human gastrointestinal tumors blocks                                     | Hospital del Mar (Barcelona)                           | MARBiobanc ( <a href="https://marbiobanc.imim.es">https://marbiobanc.imim.es</a> ) |
| <b>Chemicals, Peptides, and Recombinant Proteins</b>                     |                                                        |                                                                                    |
| Collagenase II from <i>Clostridium histolyticum</i>                      | Sigma-Aldrich                                          | Cat#C6885                                                                          |
| Hyaluronidase from bovine testes                                         | Sigma-Aldrich                                          | Cat#H3506                                                                          |
| DMEM/F-12 Advanced                                                       | GIBCO                                                  | Cat#12634028                                                                       |
| Primocin                                                                 | Invitrogen                                             | Cat#ant-pm-1                                                                       |
| B-27 Supplement (50X)                                                    | GIBCO                                                  | Cat#17504044                                                                       |
| N-2 supplement (100X)                                                    | GIBCO                                                  | Cat#17502048                                                                       |

|                                                      |                   |              |
|------------------------------------------------------|-------------------|--------------|
| Nicotinamide                                         | Sigma-Aldrich     | Cat#N3376    |
| N-Acetyl-L-cysteine                                  | Sigma-Aldrich     | Cat#A7250    |
| Recombinant Human Noggin                             | PeproTech         | Cat#120-10C  |
| Recombinant Human R-Spondin-1                        | PeproTech         | Cat#120-38   |
| Y-27632 dihydrochloride (ROCK inhibitor)             | Sigma-Aldrich     | Cat#Y0503    |
| Prostaglandin E2                                     | Tocris            | Cat#2296     |
| SB 202190                                            | Sigma-Aldrich     | Cat#S7067    |
| A8301 (ALK inhibitor)                                | Sigma-Aldrich     | Cat#SML0788  |
| hEGF                                                 | Sigma-Aldrich     | Cat#E9644    |
| Gastrin I (human)                                    | Tocris            | Cat#3006     |
| Corning Matrigel Basement Membrane Matrix, LDEV-free | Corning           | Cat#354234   |
| 5-Fluorouracil (5-FU)                                | Accord Healthcare | Cat#606544.3 |
| Irinotecan                                           | Accord Healthcare | Cat#713386.5 |
| Dasatinib                                            | Selleckchem       | Cat#S1021    |
| Verteporfin                                          | Selleckchem       | Cat#S1786    |
| D-Luciferin                                          | Goldbio           | Cat#LUCK     |
| PhosSTOP phosphatase inhibitor cocktail              | Roche             | Cat#PHOSS-RO |

|                                                        |                       |                 |
|--------------------------------------------------------|-----------------------|-----------------|
| cOmplete Mini protease inhibitor cocktail              | Roche                 | Cat#11836170001 |
| DPX mountant                                           | Sigma-Aldrich         | Cat#06522       |
| DAPI Fluoromount-G                                     | Southern Biotech      | Cat#0100-20     |
| Protein A-Sepharose CL-4B                              | GE Healthcare         | Cat#17-0780-01  |
| Protein G-Sepharose 4 Fast Flow                        | GE Healthcare         | Cat#17-0618-01  |
| <b>Critical Commercial Assays</b>                      |                       |                 |
| Dako Envision+ System-HRP Labelled Polymer anti-Rabbit | Agilent               | Cat#K4003       |
| Envision+ System-HRP Labelled Polymer anti-Mouse       | Agilent               | Cat#K4001       |
| Dako Liquid DAB+ Substrate Chromogen System            | Agilent               | Cat#K3468       |
| TSA Plus Cyanine 3/Fluorescein System                  | PerkinElmer           | Cat#NEL753001KT |
| EZ-ECL Chemiluminescence Detection Kit for HRP         | Biological Industries | Cat#20-500-120  |
| ECL Prime Western Blotting System                      | GE Healthcare         | Cat#RPN2232     |
| CellTiter-Glo Luminescent Cell Viability Assay         | Promega               | Cat#G7571       |
| APC BrdU Flow Kit                                      | BD Biosciences        | Cat#552598      |
| Senescence $\beta$ -Galactosidase Staining Kit         | Cell Signaling        | Cat#9860S       |
| Cell Event Senescence Green Flow Cytometry Assay Kit   | Invitrogen            | Cat#C10840      |
| CometAssay Kit                                         | Trevigen              | Cat#4250-050-K  |

|                                                             |                             |                        |
|-------------------------------------------------------------|-----------------------------|------------------------|
| RNeasy Micro Kit                                            | Qiagen                      | Cat#74004              |
| RT-First Strand cDNA Synthesis Kit                          | GE Healthcare Life Sciences | Cat#27-9261-01         |
| SYBR Green I Master Kit                                     | Roche                       | Cat#04887352001        |
| Annexin V Apoptosis Detection Kit APC                       | Invitrogen                  | Cat#88-8007            |
| Lenti-X Concentrator                                        | Clontech                    | Cat#631232             |
| <b>Experimental Models: Cell Lines</b>                      |                             |                        |
| Human: HEK293T                                              | ATCC                        | CRL-11268              |
| Human: HCT116                                               | ATCC                        | CCL-247                |
| Human: Ls174T                                               | ATCC                        | CL-188                 |
| Human: SW480                                                | ATCC                        | CCL-228                |
| Human: HT29                                                 | ATCC                        | HTB-38D                |
| <b>Experimental Models: Organisms/Strains</b>               |                             |                        |
| Mouse: athymic nude mice (strain: Hsd:Athymic Nude-Foxn1nu) | Envigo                      | Cat#069                |
| Mouse: NSG (strain: ANB//NOD.Cg-Prkdcscid Il2rgtm1Wjl/SzJ)  | The Jackson Laboratory      | JAX: 005557            |
| <b>Oligonucleotides</b>                                     |                             |                        |
| Primers for RT-qPCR, see Table S7                           | This study                  | N/A                    |
| Primers for Chip-qPCR, see Table S7                         | This study                  | N/A                    |
| gRNA against <i>TP53</i> , see Table S7                     | This study                  | N/A                    |
| <b>Recombinant DNA</b>                                      |                             |                        |
| Plasmid: pMD2.G                                             | From Trono Lab, unpublished | Addgene plasmid #12259 |
| Plasmid: pCMV-dR8.2 dvpr                                    | Stewart et al., 2003        | Addgene plasmid #8455  |
| Plasmid: lentiCRISPR v2                                     | Sanjana et al., 2014        | Addgene plasmid #52961 |

|                                     |                                             |                                                                                                                                                                                                                                                                              |
|-------------------------------------|---------------------------------------------|------------------------------------------------------------------------------------------------------------------------------------------------------------------------------------------------------------------------------------------------------------------------------|
| Plasmid: pLEX-hFLiG                 | Celià-Terrassa & Kang, 2018                 | N/A                                                                                                                                                                                                                                                                          |
| Plasmid: pLTPC-H2BeGFP              | Gift from Héctor G. Palmer Lab, unpublished | N/A                                                                                                                                                                                                                                                                          |
| <b>Software and Algorithms</b>      |                                             |                                                                                                                                                                                                                                                                              |
| GraphPad Prism 6                    | Graphpad Software                           | <a href="https://www.graphpad.com">https://www.graphpad.com</a> ; RRID:SCR_002798                                                                                                                                                                                            |
| Fiji (Image J)                      | Schneider et al., 2012                      | <a href="https://www.fiji.sc">https://www.fiji.sc</a> ; RRID: SCR_002285                                                                                                                                                                                                     |
| Benchling CRISPR design             | Benchling                                   | <a href="https://www.benchling.com">https://www.benchling.com</a> ; RRID: SCR_013955                                                                                                                                                                                         |
| FlowJo 10.6.2                       | BD Biosciences                              | <a href="https://www.flowjo.com">https://www.flowjo.com</a> ; RRID: SCR_008520                                                                                                                                                                                               |
| Simplicity 4.2                      | Berthold                                    | <a href="https://www.berthold.com/">https://www.berthold.com/</a>                                                                                                                                                                                                            |
| LightCycler 480 Software 1.5.1.62   | Roche                                       | <a href="http://www.roche-applied-science.com/shop/products/absolute-quantification-with-the-lightcycler-carousel-based-system">http://www.roche-applied-science.com/shop/products/absolute-quantification-with-the-lightcycler-carousel-based-system</a> ; RRID: SCR_012155 |
| Olympus CellSens Standard 1.16      | Olympus LifeSciences                        | <a href="https://www.olympus-lifescience.com/es/software/cellsens/">https://www.olympus-lifescience.com/es/software/cellsens/</a>                                                                                                                                            |
| NIS-Elements AR 4.51.01             | Nikon                                       | <a href="https://www.microscope.healthcare.nikon.com/">https://www.microscope.healthcare.nikon.com/</a>                                                                                                                                                                      |
| BD FACSDiva Software 9.0            | BD Biosciences                              | <a href="https://www.bdbiosciences.com/en-eu/products/software/instrument-software/bd-facsdiva-software">https://www.bdbiosciences.com/en-eu/products/software/instrument-software/bd-facsdiva-software</a>                                                                  |
| LAS X Life Science                  | Leica                                       | <a href="https://www.leica-microsystems.com/">https://www.leica-microsystems.com/</a>                                                                                                                                                                                        |
| Adobe Photoshop and Illustrator CS4 | Adobe Software                              | <a href="https://www.adobe.com/products/photoshop.html">https://www.adobe.com/products/photoshop.html</a> ; RRID: SCR_014199                                                                                                                                                 |
| RStudio                             | RStudio Team                                | <a href="https://rstudio.com/">https://rstudio.com/</a>                                                                                                                                                                                                                      |
| GSEA                                | Broad Institute                             | <a href="https://www.gsea-msigdb.org/gsea/index.jsp">https://www.gsea-msigdb.org/gsea/index.jsp</a>                                                                                                                                                                          |
| ggplot                              | Bioconductor                                |                                                                                                                                                                                                                                                                              |
| Corrplot                            | CRAN                                        | <a href="https://cran.r-project.org/web/packages/corrplot/index.html">https://cran.r-project.org/web/packages/corrplot/index.html</a>                                                                                                                                        |
| Survminer                           | CRAN                                        | <a href="https://CRAN.R-project.org/package=survminer">https://CRAN.R-project.org/package=survminer</a>                                                                                                                                                                      |
| Survival                            | CRAN                                        | <a href="https://CRAN.R-project.org/package=survival">https://CRAN.R-project.org/package=survival</a>                                                                                                                                                                        |
| Heatmaply                           | CRAN                                        | <a href="https://CRAN.R-project.org/package=heatmaply">https://CRAN.R-project.org/package=heatmaply</a>                                                                                                                                                                      |
| Pheatmap                            | CRAN                                        | <a href="https://CRAN.R-project.org/package=pheatmap">https://CRAN.R-project.org/package=pheatmap</a>                                                                                                                                                                        |



|                  |                       |                                                                                                                                               |
|------------------|-----------------------|-----------------------------------------------------------------------------------------------------------------------------------------------|
|                  |                       |                                                                                                                                               |
| Limma            | Bioconductor          | <a href="https://bioconductor.org/packages/release/bioc/html/limma.html">https://bioconductor.org/packages/release/bioc/html/limma.html</a>   |
| DESeq2 R package | Bioconductor          | <a href="https://bioconductor.org/packages/release/bioc/html/DESeq2.html">https://bioconductor.org/packages/release/bioc/html/DESeq2.html</a> |
| TopHat           | Kim et al 2013        | <a href="https://ccb.jhu.edu/software/tophat/index.shtml">https://ccb.jhu.edu/software/tophat/index.shtml</a>                                 |
| HTSeq            | Anders et al.<br>2015 | <a href="https://htseq.readthedocs.io/en/master/">https://htseq.readthedocs.io/en/master/</a>                                                 |

**Supplementary Table S5. List of oligonucleotides for RT-qPCR and ChIP-qPCR and sgRNA for CIRSPR/Cas9 knockout used in this study.**

| <b>Primers for RT-qPCR</b>            |                           |                         |
|---------------------------------------|---------------------------|-------------------------|
| <b>Target</b>                         | <b>Forward</b>            | <b>Reverse</b>          |
| TP53                                  | CTTTGAGGTGCGTGTTTGTG      | GGGCAGTGCTCGCTTAGT      |
| CDKN1A                                | CCGAAGTCAGTTCCTTGTGGA     | TGGTGTCTCGGTGACAAAGT    |
| MDM2                                  | GCCATTGAACCTTGTGTGATT     | GGCAGGGCTTATTCTTTTC     |
| PHLDA3                                | CAGCTGTGGAAGCGGAAG        | GCGAAGCTGAGCTCCTTG      |
| PLK2                                  | AATAACAAAGTCTACGCCGCA     | TCTTTGTCAATCTTTTCCCTTTG |
| ZMAT3                                 | CTAGGGCAAAGCGCAAATAG      | GACCAGCCACTCCAAAAGAG    |
| SESN1                                 | TGACCTGATGCCTTTCCTTC      | CCTGGGGCTTAGTACCTTCC    |
| LAPTM5                                | TCTTTTCCATCGCCTTCATC      | CCTTCTGGAGCATCTTGGAG    |
| TIMP2                                 | TTCCCTCCCTCAAAGACTGA      | CAAAGCCACCTACCTCCAAA    |
| CRIP2                                 | CGGTGGGCAGCTACATCTAT      | CTGAGCACTCTCCAGCAGA     |
| KIFC3                                 | TGCCATGTACGAGTCAGAGC      | CGGTTCTTGTCTCTTCCAG     |
| MRAS                                  | ACCGAGTTTTCCCATCAGTG      | TCTCTTCCCTCCCAGGTTT     |
| SERPINH1                              | CTTCATGGTGACTCGGTCTCT     | CGATTTGCAGCTTTTCCCTTC   |
| CD99L2                                | CGGGTTGACATGAGAAAGGT      | ATTCTGGCTTTGATGCTCGT    |
| TUBB6                                 | TGAGGGGCCACAAAATAAAC      | TATAAGGCAACACGGCACAA    |
| TPM2                                  | GGACAGAGGATGAGGTGGAA      | GCATCAGTGGCCTTCTTCTC    |
| GLIPR1                                | CGCCATCACAACTGGTATG       | ATCTGCCCAAACAACCTGAG    |
| TSPAN4                                | TGCCTCTGCTCACTTTCTT       | GTCTTGCTGGGCATACCTGT    |
| ICAM1                                 | GAAGTGGCCCTCCATAGACA      | TCAAGGGTTGGGGTCAGTAG    |
| ARL4C                                 | TGAGTCCCTGCCTATTGTCC      | CAGATGGGCTGCTAGGTTTC    |
| VAMP5                                 | CCTGAAGGAGAAGCCAAATG      | GTCAAGGGAGAGCAAACACC    |
| GPC1                                  | CCCTACGCTCATCTCTGGAA      | GACCTTGTGGAGGAAGGACA    |
| COL18A1                               | GAGGGACAAGTGGACTCAGG      | TTGGCTTACATCACACACA     |
| AGMAT                                 | TCTTTCTGGGAACACAGCCC      | CGGTTGTCACTTTGGGGAGA    |
| KCNK5                                 | GAGGTGTGAGTCTGCGGAAG      | GCCCTCGATGTAGTTCCACC    |
| CDX1                                  | ACCTCCTCTCCAATGCCTGT      | AGACTCGGACCAGACCTCCT    |
| HPRT1                                 | ATAAGCCAGACTTTGTTGG       | ATAGGACTCCAGATGTTTCC    |
| TBP                                   | GGAAGTGACATTATCAACGC      | CCAAGAAACAGTGATGCTG     |
| ACTB                                  | GCACCACACCTTCTACAATGAGC   | TAGCACAGCCTGGATAGCAACG  |
| <b>Primers for ChIP-qPCR</b>          |                           |                         |
| <b>Target</b>                         | <b>Forward</b>            | <b>Reverse</b>          |
| MDM2                                  | GGGCAGGTTGACTCAGCTTTT     | AGCTGGGAAAATGCATGGTTTA  |
| BAX                                   | GGTTCCTGGCTCTCTGATCC      | AGGCTGGGCCTGTATCCTAC    |
| CDKN1A                                | AGCAGGCTGTGGCTCTGATT      | CAAAATAGCCACCAGCCTCTTCT |
| ZMAT3                                 | CAAATTGCCACAAACATTCTGC    | CTGGGGGAGACACATGCTAGA   |
| <b>sgRNA for CRISPR/Cas9 knockout</b> |                           |                         |
| <b>Target</b>                         | <b>sgRNA sequence</b>     |                         |
| TP53 – Guide 1                        | CACCGTCGACGCTAGGATCTGACTG |                         |
| TP53 – Guide 2                        | CACCGACCAGCAGCTCCTACACCGG |                         |
| TP53 – Guide 3                        | CACCGCCATTGTTCAATATCGTCCG |                         |
| YAP1 – Guide 1                        | CACCGTCAGATCGTGCACGTCCGCG |                         |
| YAP1 – Guide 2                        | CACCGGAATGAGCTCGAACATGCTG |                         |
| YAP1 – Guide 3                        | CACCGTGTGGAAGATGCTGAGCTGT |                         |

**Supplementary Table S6. Tissue microarray (TMA) samples used in this study.**  
 Samples obtained at diagnosis. The corresponding clinical data and H-score of nuclear YAP1 is indicated.

| Patient n° | Tumour Location  | Clinical TNM | Treatment                       | nYAP1 Hscore | OS (mo) | DFS (mo) |
|------------|------------------|--------------|---------------------------------|--------------|---------|----------|
| 1          | Sigma            | T3N0         | Surgery                         | 8,3          | 42,6    | 42,6     |
| 2          | Rectum-Sigma     | T3N2M1 lung  | Chemotherapy + Targeted therapy | 135,0        | 47,8    | 47,8     |
| 3          | Sigma            | T4N2         | Chemotherapy                    | 126,7        | 77,0    | 77,0     |
| 4          | Right colon      | T3N1         | Chemotherapy                    | 160,0        | 27,3    | 27,3     |
| 5          | Splenic angle    | T4N2         | Surgery                         | 240,0        | 6,0     | 6,0      |
| 6          | Right colon      | T2N0         | Chemotherapy                    | 40,0         | 75,0    | 75,0     |
| 7          | Sigma            | T3N1         | Surgery                         | 70,0         | 58,9    | 58,9     |
| 8          | Sigma            | T3N1         | Chemotherapy                    | 20,0         | 69,0    | 69,0     |
| 9          | Sigma            | T3N1         | Chemotherapy                    | 63,3         | 74,0    | 74,0     |
| 10         | Sigma            | N/A          | Surgery                         | 46,7         | 67,9    | 67,9     |
| 11         | Right colon      | T4N1         | Surgery                         | 0,0          | 20,3    | 15,2     |
| 12         | Sigma            | T3N2         | Surgery                         | 190,0        | 56,9    | 23,3     |
| 13         | Sigma            | T3N0         | Surgery                         | 43,3         | 61,8    | 61,8     |
| 14         | Rectum           | T2N2         | Chemotherapy+Radiotherapy       | 66,7         | 70,0    | 32,5     |
| 15         | Sigma            | T3NX         | Chemotherapy                    | 60,0         | 12,2    | 35,6     |
| 16         | Sigma            | T3N0         | Surgery                         | 3,3          | 7,1     | 7,1      |
| 17         | Sigma            | T3N0         | Surgery                         | 0,0          | 74,0    | 74,0     |
| 18         | Rectum           | T3N0         | Surgery                         | 40,0         | 23,4    | 8,2      |
| 19         | Sigma            | T3N0         | Surgery                         | 33,3         | 36,5    | 36,5     |
| 20         | Right colon      | T3N0         | Surgery                         | 6,7          | 51,8    | 51,8     |
| 21         | Sigma            | T3N0         | Surgery                         | 3,3          | 67,0    | 67,0     |
| 22         | Sigma            | T3N0         | Surgery                         | 0,0          | 74,1    | 74,1     |
| 23         | Ascendent colon  | T3N2         | Chemotherapy                    | 30,0         | 30,4    | 30,4     |
| 24         | Sigma            | T3N0         | Surgery                         | 73,3         | 72,0    | 72,0     |
| 25         | Right colon      | T3N2         | Chemotherapy                    | 93,3         | 67,0    | 67,0     |
| 26         | Right colon      | T3N0         | Surgery                         | 3,3          | 60,9    | 32,5     |
| 27         | Sigma            | T3N2         | Chemotherapy+Targeted therapy   | 93,3         | 24,3    | 10,1     |
| 28         | Right colon      | T3N0         | Surgery                         | 53,3         | 63,9    | 63,9     |
| 29         | Right colon      | T4N0         | Chemotherapy                    | 53,3         | 64,9    | 64,9     |
| 30         | Sigma            | T4N0         | Chemotherapy                    | 5,0          | 26,4    | 26,4     |
| 31         | Right colon      | T4N0         | Surgery                         | 0,0          | 2,0     | 2,0      |
| 32         | Sigma            | T3N0         | Surgery                         | 6,7          | 26,4    | 26,4     |
| 33         | Descendent colon | T4N0         | N/A                             | 25,0         | 29,4    | 25,3     |
| 34         | Rectum-Sigma     | T3N0         | Surgery                         | 46,7         | 67,9    | 67,9     |
| 35         | Rectum-Sigma     | T3N0         | Surgery                         | 130,0        | 67,9    | 67,9     |
| 36         | Sigma            | T3N1         | Chemotherapy+Radiotherapy       | 0,0          | 46,7    | 5,1      |
| 37         | Right colon      | T4N1         | Surgery                         | 100,0        | 22,3    | 13,2     |
| 38         | Sigma            | T4N1         | Surgery                         | 40,0         | 28,4    | 28,4     |
| 39         | Sigma            | T3N1         | Chemotherapy                    | N/A          | 62,9    | 62,9     |
| 40         | Rectum           | T3N0         | Chemotherapy+Radiotherapy       | 146,7        | 64,9    | 64,9     |
| 41         | Rectum-Sigma     | T2N0         | Chemotherapy+Radiotherapy       | 96,7         | 67,9    | 67,9     |

|    |                  |      |                               |       |      |      |
|----|------------------|------|-------------------------------|-------|------|------|
| 42 | Right colon      | T2N1 | Chemotherapy                  | 12,5  | 70,0 | 70,0 |
| 43 | Sigma            | T4N1 | Chemotherapy                  | 0,0   | 63,9 | 63,9 |
| 44 | Splenic angle    | T4N1 | Surgery                       | 103,3 | 21,3 | 9,1  |
| 45 | Right colon      | T3N0 | N/A                           | 120,0 | 33,5 | 33,5 |
| 46 | Right colon      | T3N1 | Surgery                       | 20,0  | 5,0  | 5,0  |
| 47 | Right colon      | T4N2 | Surgery                       | 0,0   | 5,1  | 3,0  |
| 48 | Right colon      | T3N0 | Surgery                       | 5,0   | 65,0 | 65,0 |
| 49 | Sigma            | T4N0 | Chemotherapy                  | 0,0   | 64,9 | 64,9 |
| 50 | Right colon      | T3N2 | Chemotherapy                  | 3,3   | 15,2 | 11,2 |
| 51 | Sigma            | T4N1 | Chemotherapy                  | 22,5  | 66,9 | 66,9 |
| 52 | Sigma            | T4N1 | Chemotherapy+Targeted therapy | 12,5  | 29,4 | 14,2 |
| 53 | Descendent colon | T2N1 | Surgery                       | 20,0  | 65,9 | 65,9 |
| 54 | Sigma            | T3N2 | Surgery                       | 10,0  | 10,1 | 6,0  |
| 55 | Sigma            | T4N2 | Surgery                       | 48,3  | 60,9 | 18,2 |
| 56 | Right colon      | T3N0 | Surgery                       | 45,0  | 71,0 | 71,0 |
| 57 | Sigma            | T3N0 | Surgery                       | 2,5   | 75,1 | 75,1 |
| 58 | Sigma            | T3N1 | Surgery                       | 0,0   | 55,8 | 55,8 |
| 59 | Hepatic angle    | T3N0 | Surgery                       | 0,0   | 66,0 | 66,0 |
| 60 | Rectum-Sigma     | T3N0 | Surgery                       | N/A   | 28,4 | 28,4 |
| 61 | Right colon      | T3N0 | Surgery                       | 6,7   | 62,9 | 62,9 |
| 62 | Right colon      | T3N2 | Chemotherapy                  | 73,3  | 68,0 | 68,0 |
| 63 | Right colon      | T3N0 | Surgery                       | 65,0  | 1,0  | 1,0  |
| 64 | Right colon      | T3N1 | Chemotherapy                  | 27,5  | 52,8 | 52,8 |
| 65 | Sigma            | T3N0 | Surgery                       | 0,0   | 74,0 | 22,4 |
| 66 | Right colon      | T3N1 | Chemotherapy                  | 45,0  | 72,0 | 18,3 |
| 67 | Right colon      | T3N0 | Surgery                       | 1,7   | 72,0 | 72,0 |
| 68 | Rectum-Sigma     | T4N2 | Chemotherapy+Radiotherapy     | 160,0 | 16,3 | 15,2 |
| 69 | Rectum           | T3N0 | Surgery                       | 66,7  | 70,0 | 70,0 |
| 70 | Sigma            | T3N2 | Chemotherapy                  | 60,0  | 70,0 | 70,0 |
| 71 | Right colon      | T3N0 | Surgery                       | 75,0  | 65,9 | 65,9 |
| 72 | Splenic angle    | T3N0 | Surgery                       | 160,0 | 10,1 | 10,1 |
| 73 | Sigma            | T3N0 | Surgery                       | 3,3   | 39,5 | 39,5 |
| 74 | Rectum           | T4N0 | Chemotherapy+Radiotherapy     | 37,5  | 63,9 | 63,9 |
| 75 | Right colon      | T3N1 | Chemotherapy+Targeted therapy | 43,3  | 70,0 | 70,0 |
| 76 | Sigma            | T3N1 | Chemotherapy                  | 63,3  | 75,0 | 75,0 |
| 77 | Rectum           | T4N1 | No treatment                  | 0,0   | 14,2 | 11,1 |
| 78 | Right colon      | T3N0 | Surgery                       | 23,3  | 41,6 | 13,2 |
| 79 | Right colon      | T4N2 | Surgery                       | N/A   | 37,5 | 33,5 |
| 80 | Descendent colon | T3N2 | Chemotherapy                  | 3,3   | 68,0 | 68,0 |
| 81 | Sigma            | T4N0 | Chemotherapy                  | 18,3  | 60,9 | 60,9 |
| 82 | Sigma            | T4N1 | Chemotherapy                  | 3,3   | 65,9 | 37,6 |
| 83 | Sigma            | T4N0 | Chemotherapy                  | 33,3  | 62,9 | 62,9 |
| 84 | Right colon      | T3N0 | Surgery                       | 0,0   | 67,0 | 67,0 |
| 85 | Right colon      | T4N0 | Surgery                       | 20,0  | 30,4 | 8,1  |
| 86 | Descendent colon | T4N1 | Chemotherapy                  | 16,7  | 63,9 | 63,9 |
| 87 | Rectum           | T3N1 | Chemotherapy+Radiotherapy     | 166,7 | 67,9 | 39,6 |
| 88 | Sigma            | T3N1 | Chemotherapy                  | 26,7  | 59,8 | 59,8 |
| 89 | Right colon      | T3N0 | Surgery                       | 3,3   | 0,0  | 0,0  |

|     |                  |      |                               |       |      |      |
|-----|------------------|------|-------------------------------|-------|------|------|
| 90  | Descendent colon | T3N1 | Chemotherapy                  | 26,7  | 50,7 | 50,7 |
| 91  | Descendent colon | T3N1 | Chemotherapy                  | 3,3   | 71,0 | 71,0 |
| 92  | Sigma            | T3N0 | Surgery                       | 3,3   | 65,9 | 65,9 |
| 93  | Right colon      | T3N0 | Surgery                       | 36,7  | 72,1 | 72,1 |
| 94  | Right colon      | T3N0 | Surgery                       | 6,7   | 25,4 | 25,4 |
| 95  | Right colon      | T3N0 | Chemotherapy+Radiotherapy     | 23,3  | 52,8 | 32,5 |
| 96  | Right colon      | T3N0 | Chemotherapy                  | 3,3   | 61,9 | 61,9 |
| 97  | Right colon      | T3N0 | Surgery                       | 100,0 | 64,9 | 64,9 |
| 98  | Sigma            | T3N0 | Surgery                       | 1,0   | 10,1 | 10,1 |
| 99  | Sigma            | T3N0 | Surgery                       | 2,5   | 60,9 | 60,9 |
| 100 | Right colon      | T3N1 | Chemotherapy                  | 0,0   | 61,9 | 61,9 |
| 101 | Rectum-Sigma     | T3N0 | Surgery                       | 2,5   | 62,9 | 62,9 |
| 102 | Sigma            | T3N0 | Surgery                       | 13,3  | 60,9 | 60,9 |
| 103 | Sigma            | T3N2 | Chemotherapy+Targeted therapy | 100,0 | 63,9 | 3,0  |
| 104 | Sigma            | T3N1 | Chemotherapy                  | 106,7 | 24,3 | 24,3 |
| 105 | Sigma            | T4N1 | Chemotherapy                  | 58,3  | 64,9 | 64,9 |
| 106 | Right colon      | T3N1 | Chemotherapy                  | 86,7  | 3,0  | 3,0  |
| 107 | Right colon      | T3N1 | Chemotherapy                  | 40,0  | 61,9 | 61,9 |
| 108 | Right colon      | T3N0 | N/A                           | 6,7   | 33,5 | 33,5 |
| 109 | Transverse colon | T3N0 | Surgery                       | 3,3   | 67,0 | 67,0 |
| 110 | Right colon      | T3N0 | Surgery                       | 63,3  | 32,5 | 13,2 |
| 111 | Right colon      | T3N0 | Surgery                       | 66,7  | 59,8 | 59,8 |
| 112 | Splenic angle    | T3N0 | Surgery                       | 5,0   | 64,9 | 64,9 |
| 113 | Sigma            | T3N0 | Surgery                       | 80,0  | 50,7 | 8,2  |
| 114 | Sigma            | T3N0 | Surgery                       | 63,3  | 52,8 | 52,8 |
| 115 | Hepatic angle    | T3N0 | Surgery                       | 30,0  | 58,8 | 58,8 |
| 116 | Right colon      | T3N0 | Surgery                       | 45,0  | 54,8 | 54,8 |
| 117 | Rectum-Sigma     | T3N0 | Chemotherapy+Radiotherapy     | 140,0 | 60,9 | 60,9 |
| 118 | Rectum           | T2N1 | Chemotherapy+Radiotherapy     | 40,0  | 63,9 | 63,9 |
| 119 | Sigma            | T3N0 | Surgery                       | 40,0  | 53,8 | 53,8 |
| 120 | Descendent colon | T3N0 | Surgery                       | 140,0 | 54,8 | 54,8 |
| 121 | Right colon      | T4N2 | Chemotherapy                  | 83,3  | 18,2 | 10,1 |
| 122 | Splenic angle    | T3N1 | Surgery                       | 46,7  | 61,8 | 61,8 |
| 123 | Rectum-Sigma     | T3N0 | Chemotherapy                  | 103,3 | 60,9 | 60,9 |
| 124 | Sigma            | T3N1 | Chemotherapy                  | 10,0  | 59,8 | 59,8 |
| 125 | Sigma            | T3N2 | Chemotherapy+Targeted therapy | 41,7  | 42,6 | 14,1 |
| 126 | Rectum-Sigma     | T4N0 | Surgery                       | 20,0  | 31,5 | 23,3 |
| 127 | Right colon      | T3N0 | Surgery                       | 18,3  | 58,8 | 58,8 |
| 128 | Right colon      | T4N0 | Surgery                       | 10,7  | 55,8 | 55,8 |
| 129 | Descendent colon | T3N0 | Surgery                       | 0,0   | 56,8 | 9,1  |
| 130 | Rectum           | T3N0 | Chemotherapy+Radiotherapy     | 16,7  | 56,8 | 56,8 |
| 131 | Descendent colon | T3N0 | Surgery                       | 23,3  | 51,7 | 51,7 |
| 132 | Rectum-Sigma     | T2N0 | Chemotherapy+Radiotherapy     | 0,0   | 48,7 | 48,7 |
| 133 | Right colon      | T3N0 | Surgery                       | 33,3  | 67,0 | 67,0 |
| 134 | Right colon      | T3N0 | Surgery                       | 50,0  | 49,7 | 49,7 |
| 135 | Splenic angle    | T4N0 | Surgery                       | 4,0   | 58,8 | 58,8 |
| 136 | Rectum           | T2N0 | Chemotherapy+Radiotherapy     | N/A   | 19,3 | 19,3 |
| 137 | Rectum-Sigma     | T1N0 | Chemotherapy+Radiotherapy     | 110,0 | 54,8 | 54,8 |

|     |                  |      |                           |       |      |      |
|-----|------------------|------|---------------------------|-------|------|------|
| 138 | Rectum-Sigma     | T2N0 | Chemotherapy+Radiotherapy | 15,0  | 54,8 | 54,8 |
| 139 | Right colon      | T3N1 | Chemotherapy              | 50,0  | 58,8 | 58,8 |
| 140 | Sigma            | T4N2 | Surgery                   | 160,0 | 0,0  | 0,0  |
| 141 | Ascendent colon  | T3N0 | Surgery                   | 56,7  | 58,8 | 58,8 |
| 142 | Sigma            | T3N0 | Surgery                   | 15,0  | 35,5 | 35,5 |
| 143 | Rectum-Sigma     | T3N1 | Chemotherapy+Radiotherapy | 50,0  | 28,5 | 11,2 |
| 144 | Right colon      | T3N2 | Chemotherapy              | 20,0  | 52,8 | 52,8 |
| 145 | Right colon      | T4N2 | Chemotherapy              | 8,3   | 53,8 | 53,8 |
| 146 | Descendent colon | T4N1 | Chemotherapy              | 35,0  | 58,8 | 30,5 |
| 147 | Right colon      | T4N1 | Surgery                   | 0,0   | 54,8 | 54,8 |
| 148 | Rectum-Sigma     | T3N1 | Chemotherapy              | 93,3  | 58,8 | 58,8 |
| 149 | Sigma            | T1N1 | Chemotherapy              | 1,7   | 57,8 | 57,8 |
| 150 | Sigma            | T3N2 | Chemotherapy              | 8,3   | 56,8 | 56,8 |
| 151 | Right colon      | T4N1 | Surgery                   | 0,0   | 52,8 | 52,8 |
| 152 | Right colon      | T4N1 | Chemotherapy              | 160,0 | 54,7 | 54,7 |
| 153 | Descendent colon | T3N1 | Chemotherapy              | 1,7   | 56,8 | 15,2 |
| 154 | Sigma            | T3N2 | Surgery                   | 100,0 | 66,0 | 16,2 |
| 155 | Sigma            | T3N1 | Chemotherapy              | 90,0  | 57,8 | 57,8 |
| 156 | Sigma            | T1N0 | Chemotherapy              | 5,0   | 20,3 | 20,3 |
| 157 | Caecum           | T3N2 | Chemotherapy              | 21,7  | 56,8 | 56,8 |
| 158 | Right colon      | T2N1 | Chemotherapy              | 50,0  | 63,8 | 63,8 |
| 159 | Right colon      | T3N0 | Surgery                   | 0,0   | 52,7 | 52,7 |
| 160 | Right colon      | T3N0 | Surgery                   | 17,0  | 13,2 | 7,1  |
| 161 | Sigma            | T3N0 | Surgery                   | 60,0  | 51,8 | 51,8 |
| 162 | Sigma            | T3N0 | Surgery                   | 12,5  | 59,8 | 59,8 |
| 163 | Descendent colon | T3N0 | Surgery                   | 6,7   | 57,8 | 57,8 |
| 164 | Rectum-Sigma     | T2N0 | Radiotherapy              | 110,0 | 55,8 | 55,8 |
| 165 | Descendent colon | T3N2 | Chemotherapy+Radiotherapy | 63,3  | 41,6 | 41,6 |
| 166 | Rectum-Sigma     | T3N2 | Chemotherapy              | 6,7   | 48,7 | 48,7 |
| 167 | Sigma            | T4N2 | Chemotherapy              | 153,3 | 58,8 | 58,8 |
| 168 | Sigma            | T4N0 | Chemotherapy              | 26,7  | 60,9 | 60,9 |
| 169 | Right colon      | T2N1 | Chemotherapy              | 8,3   | 55,8 | 55,8 |
| 170 | Right colon      | T3N1 | Chemotherapy              | 0,0   | 52,7 | 52,7 |
| 171 | Sigma            | T3N1 | Surgery                   | 11,7  | 56,9 | 56,9 |
| 172 | Ascendent colon  | T4N1 | Chemotherapy              | 36,7  | 58,8 | 58,8 |
| 173 | Right colon      | T3N0 | Surgery                   | 0,0   | 55,8 | 55,8 |
| 174 | Transverse colon | T4N1 | Chemotherapy              | 106,7 | 59,8 | 59,8 |
| 175 | Right colon      | T3N1 | Chemotherapy              | 6,7   | 61,9 | 38,6 |
| 176 | Sigma            | T4N2 | Chemotherapy              | N/A   | 62,9 | 33,5 |
| 177 | Sigma            | T3N0 | Surgery                   | 50,0  | 56,8 | 56,8 |
| 178 | Right colon      | T4N0 | Chemotherapy              | 60,0  | 57,8 | 57,8 |
| 179 | Splenic angle    | T3N0 | Surgery                   | 1,7   | 61,9 | 61,9 |
| 180 | Descendent colon | T3N0 | Chemotherapy              | 0,0   | 62,8 | 62,8 |
| 181 | Sigma            | T3N2 | Surgery                   | 86,7  | 1,0  | 1,0  |
| 182 | Rectum-Sigma     | T3N2 | Chemotherapy              | 63,3  | 49,6 | 49,6 |
| 183 | Sigma            | T4N0 | Chemotherapy              | 56,7  | 60,9 | 60,9 |
| 184 | Ascendent colon  | T3N0 | Surgery                   | 4,0   | 52,7 | 52,7 |
| 185 | Rectum-Sigma     | T3N1 | Chemotherapy              | 0,0   | 64,9 | 25,3 |

|            |                  |      |              |       |      |      |
|------------|------------------|------|--------------|-------|------|------|
| <b>186</b> | Right colon      | T3N0 | Surgery      | N/A   | 25,4 | 14,2 |
| <b>187</b> | Descendent colon | T3N0 | Chemotherapy | 66,7  | 68,0 | 68,0 |
| <b>188</b> | Sigma            | T4N0 | Chemotherapy | 110,0 | 51,7 | 13,2 |
| <b>189</b> | Right colon      | T4N0 | Surgery      | 0,0   | 54,8 | 54,8 |
| <b>190</b> | Sigma            | T2N1 | Chemotherapy | 5,0   | 52,7 | 52,7 |
| <b>191</b> | Right colon      | T3N0 | Surgery      | 26,7  | 53,8 | 53,8 |
| <b>192</b> | Rectum-Sigma     | T3N1 | Surgery      | 0,0   | 1,0  | 1,0  |
| <b>193</b> | Right colon      | T3N0 | Surgery      | 21,7  | 0,0  | 0,0  |
| <b>194</b> | Right colon      | T3N0 | Surgery      | 33,3  | 61,9 | 61,9 |
