# Supplementary material for: p53 wild-type colorectal cancer cells that express a fetal gene signature are associated with metastasis and poor prognosis
Source: PubMed Central journal article supplement (PMC9126967; doi:10.1038/s41467-022-30382-9), 2022-05-23

## Uncropped scans of all blots in Supplementary Information

**Figure S1j: anti- $\gamma$ H2AX**

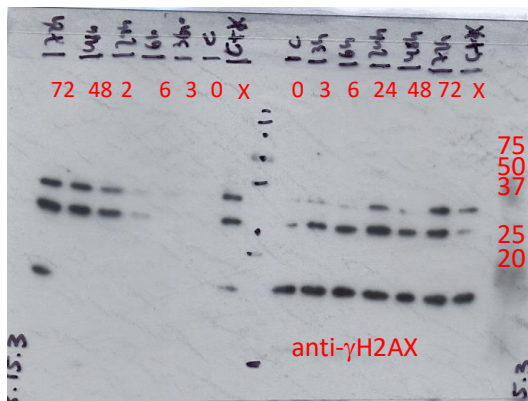

**Figure S1j: anti-H3**

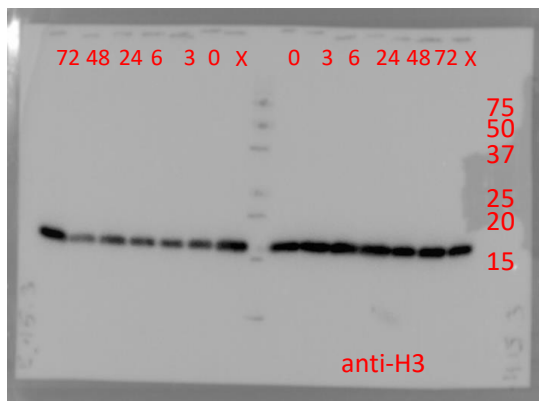

**Figure S1k: anti- $\gamma$ H2AX**

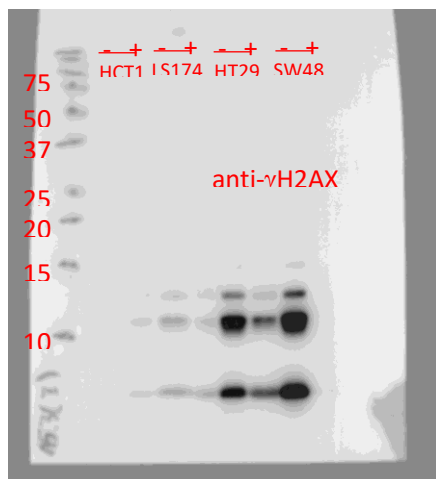

**Figure S1k: anti-H3**

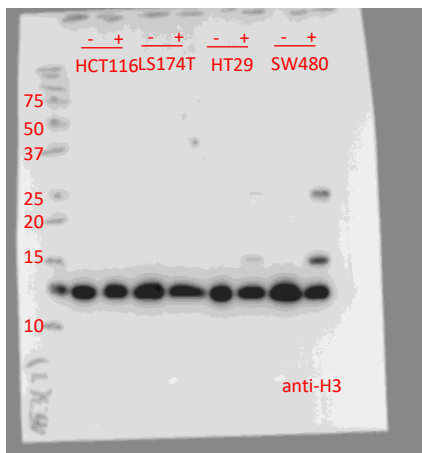

**Figure S4a: anti-YAP1**

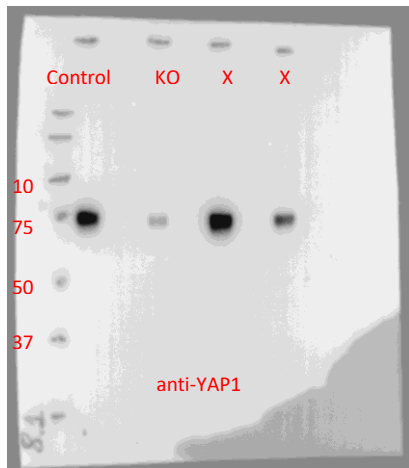

**Figure S4a: anti-Tubulin**

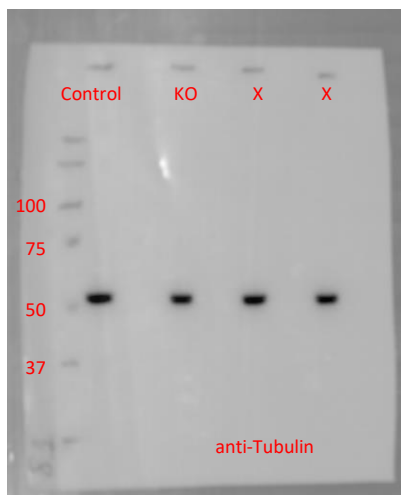

Supplement: 41467_2022_30382_MOESM6_ESM.pdf [file 41467_2022_30382_MOESM6_ESM.pdf]
